# Supplementary material for: A primary SERS-active interconnected Si-nanocore network for biomolecule detection with plasmonic nanosatellites as a secondary boosting mechanism
Source: Royal Society of Chemistry journal article supplement (doi:10.1039/c7ra01970j), 2017-01-01
Supplement: c7ra01970j1.pdf [file c7ra01970j1.pdf]

**Supporting Info:**

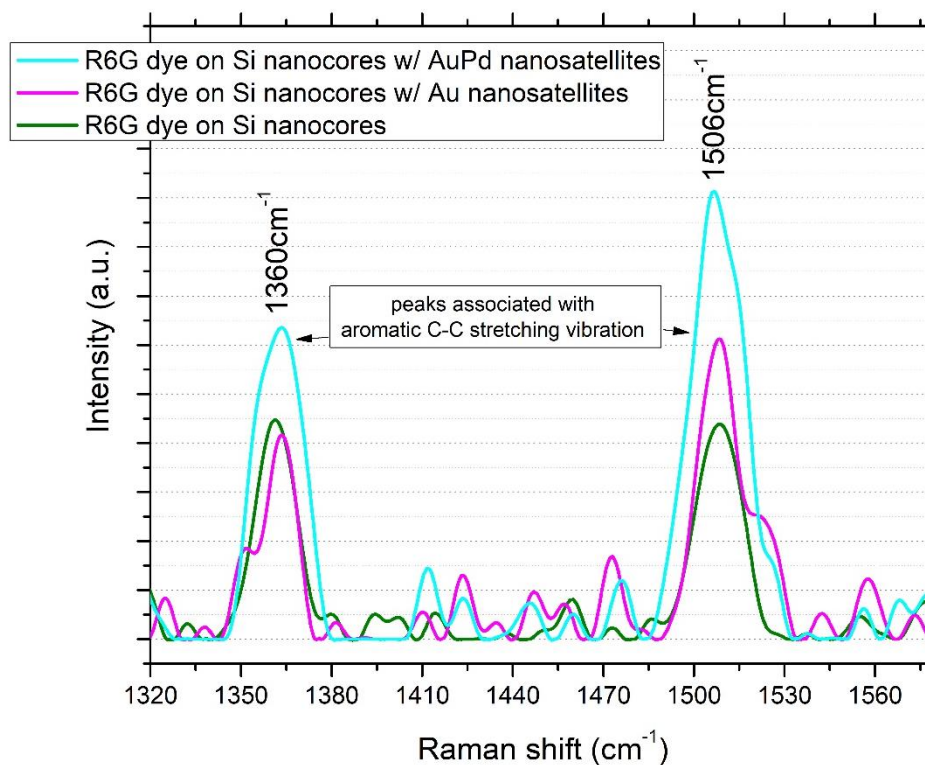

*Figure S1: Raman spectra of Rhodamine 6G (R6G) on a) Si nanocore substrate, b) Si nanocore substrate w/ Au nanosatellites and c) Si nanocore substrate w/ AuPd nanosatellites. Observed Peaks at 1360cm<sup>-1</sup> and 1506cm<sup>-1</sup> are associated with vibrational modes for aromatic C-C stretching<sup>1</sup>*

References:

1. Z. Li, S. C. Xu, C. Zhang, X. Y. Liu, S. S. Gao, L. T. Hu, J. Guo, Y. Ma, S. Z. Jiang and H. P. Si, Scientific reports, 2016, 6, 38539.
